# Supplementary material
Source: ML conference proceedings conference paper supplement (https://aclanthology.org/D11-1036)
Supplement: Attachment [file D11-1036.Attachment.zip]

# LTH Conversion Settings

This file contains the conversion options of the LTH constituency-to-dependency conversion and the value specification for all the settings we used in the experiments. More information concerning the algorithm can be found at [http://nlp.cs.lth.se/software/treebank\\_converter/](http://nlp.cs.lth.se/software/treebank_converter/).

| Option                                          | Default LTH | Old LTH | CoNLL 2007 | Functional | Lexical |
|-------------------------------------------------|-------------|---------|------------|------------|---------|
| coordination structure format                   | melchuk     | oldLTH  | prague     | prague     | prague  |
| POS as head of Possessive                       | false       | false   | false      | true       | false   |
| PREP as head of PP                              | true        | false   | true       | true       | false   |
| IN/DT as head of SBAR                           | true        | false   | false      | true       | false   |
| WH head or relative clause                      | false       | false   | false      | true       | false   |
| INF as head of VP                               | true        | false   | false      | true       | false   |
| split Small Clauses                             | false       | false   | false      | false      | false   |
| use adverbial tags (TMP, LOC)                   | true        | true    | false      | false      | false   |
| separate root labels (ROOT-S ROOT-FRAG)         | false       | true    | false      | false      | false   |
| separate coordination labels (SCCOORD, VPCOORD) | false       | false   | false      | false      | false   |
| split slash A/B                                 | true        | false   | false      | false      | false   |
| DDT encoding of gapping                         | true        | false   | false      | false      | false   |
| CoNLL 2008 Cleft sentences                      | true        | false   | false      | false      | false   |
| CoNLL 2008 Expletive annotation                 | true        | false   | false      | false      | false   |
| IOBJ for indirect objects                       | false       | true    | true       | true       | true    |
| move cyclic parentheticals to top               | true        | false   | false      | false      | false   |
| annotate dependencies inside names as NAME      | true        | false   | false      | false      | false   |
| use the SUFFIX label for possessive suffixes    | true        | false   | false      | false      | false   |
| use the TITLE label for titles in names         | true        | false   | false      | false      | false   |
| annotate posthonorifics using POSTHON           | true        | false   | false      | false      | false   |
| annotate appositions using APPO                 | true        | false   | false      | false      | false   |
| use the CLR function tag                        | false       | true    | true       | true       | true    |
| add structure to numerical phrases              | false       | false   | false      | false      | false   |
| dependencies inside numerical phrases as QMOD   | false       | false   | false      | false      | false   |
